# Supplementary material
Source: PubMed Central journal article supplement (PMC11019888)

# PIGR (~85-100KDa)

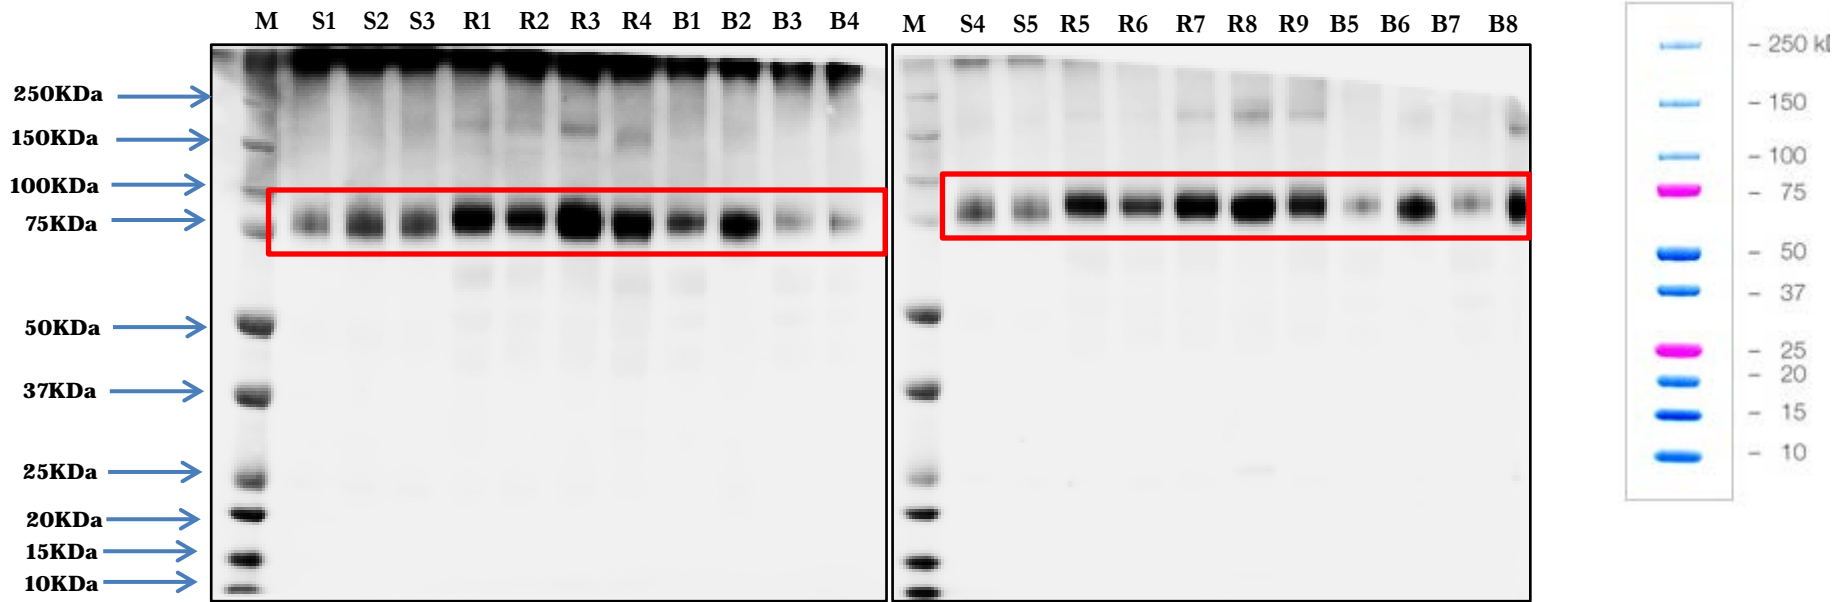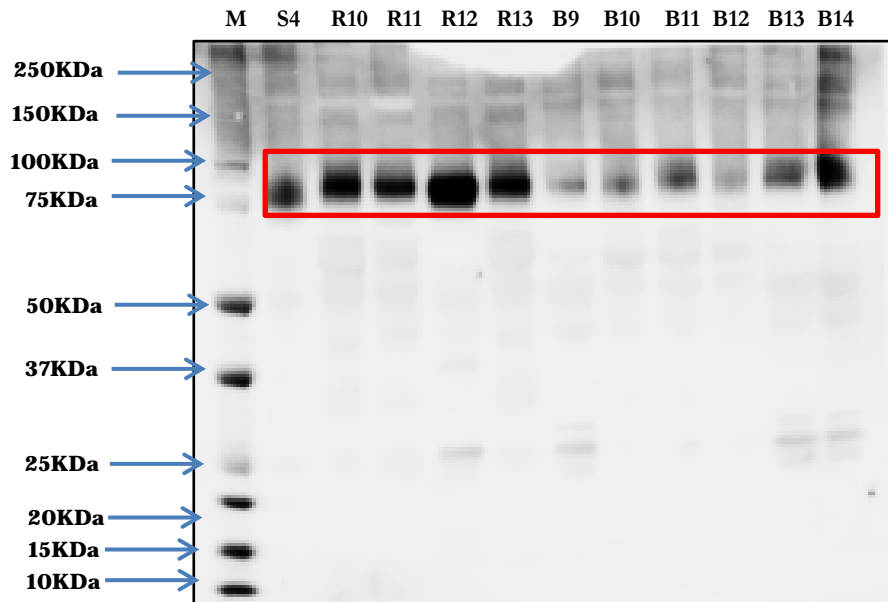



# CIITA (~150KDa)

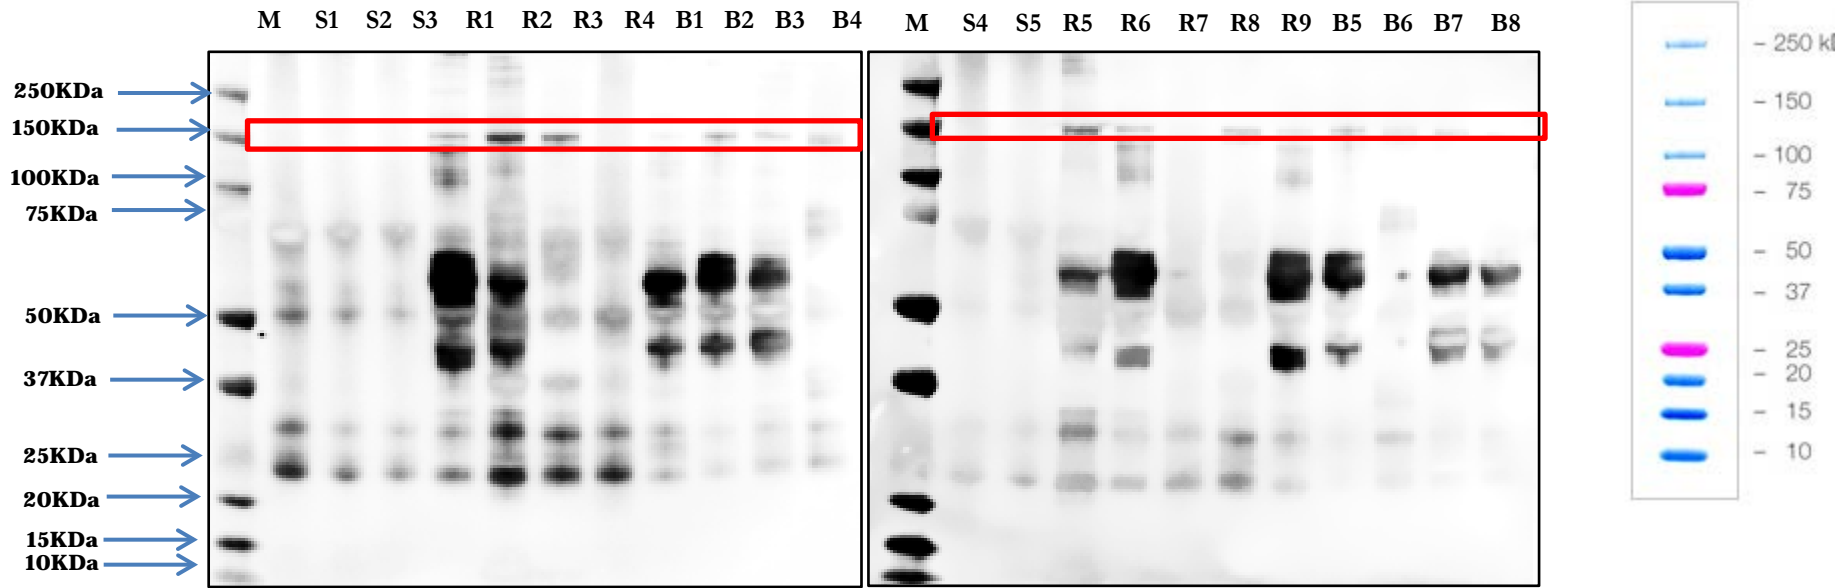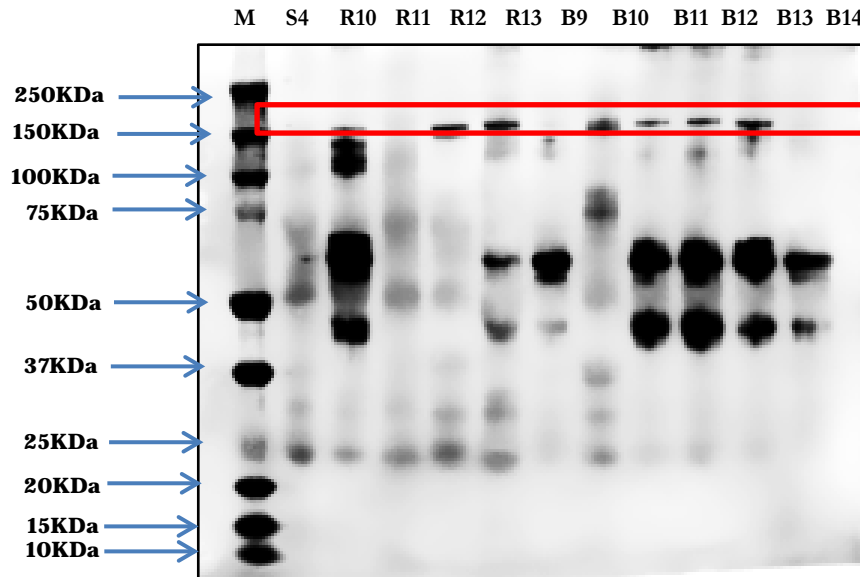

# NFκB (~65KDa)

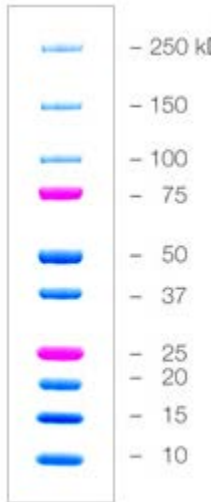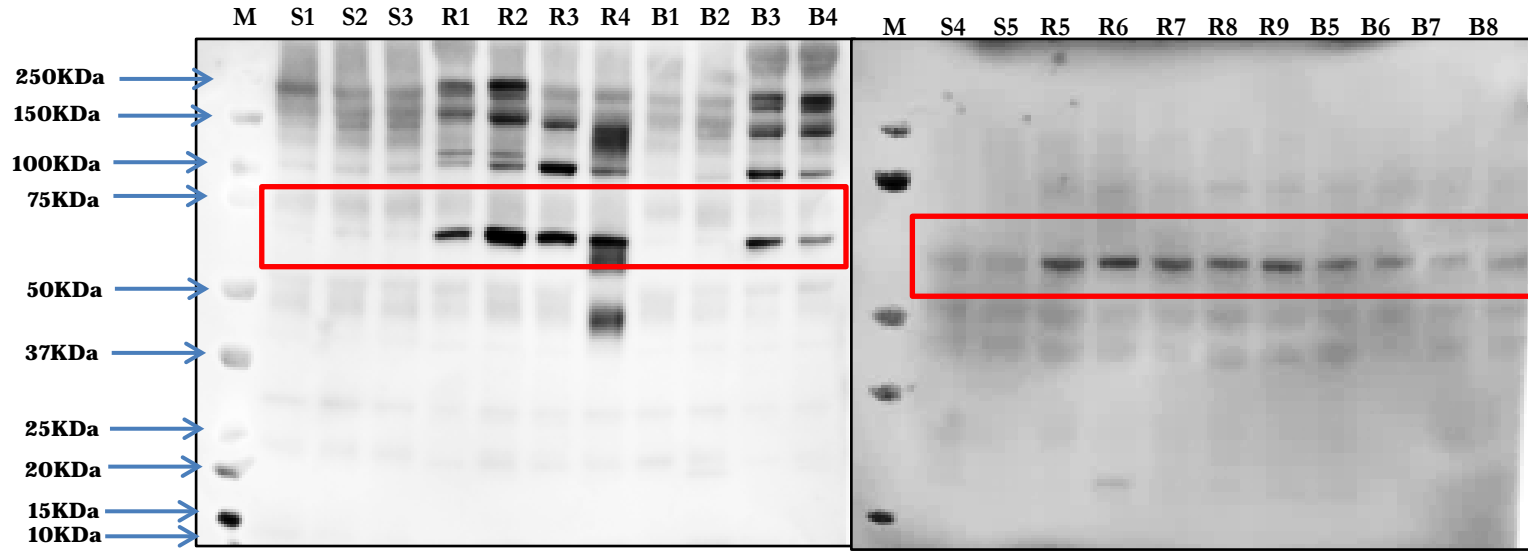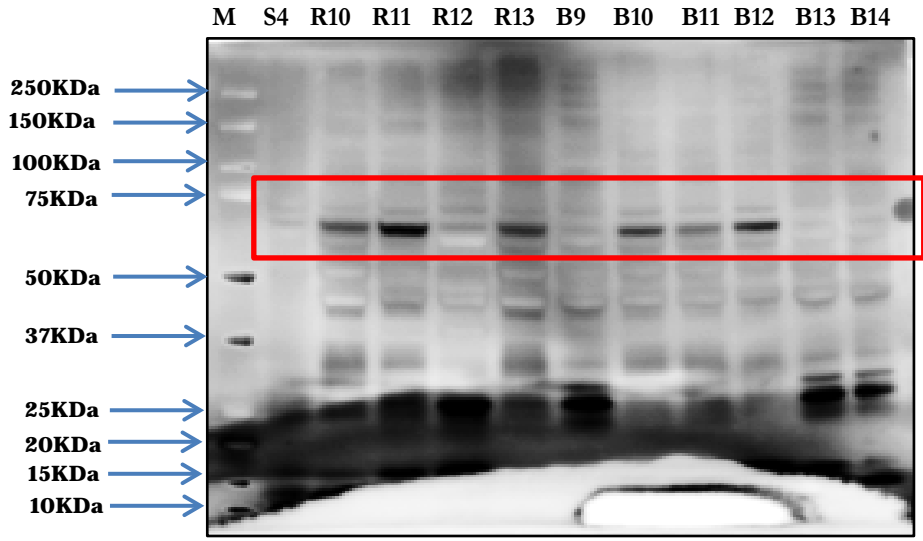

# CD9 for PIGR , 20S proteasome, CIITA and NFkB (~24KDa)

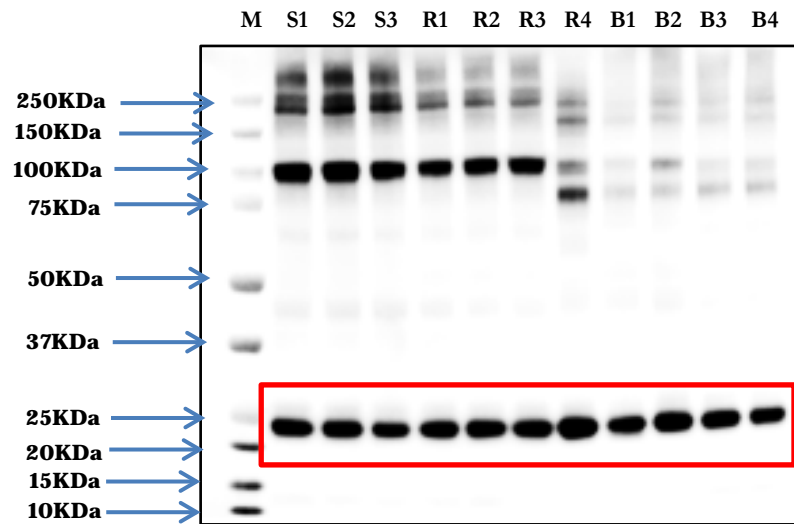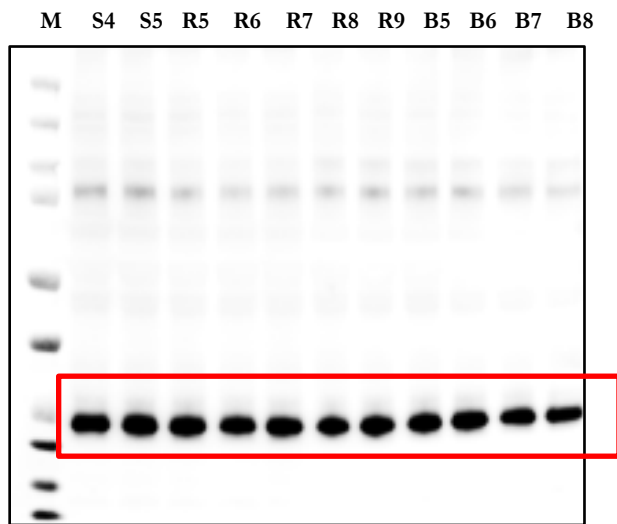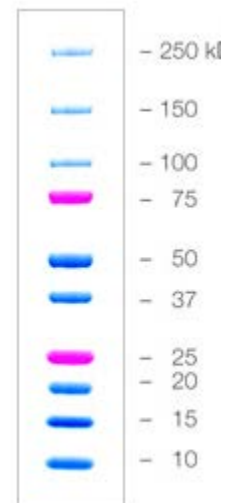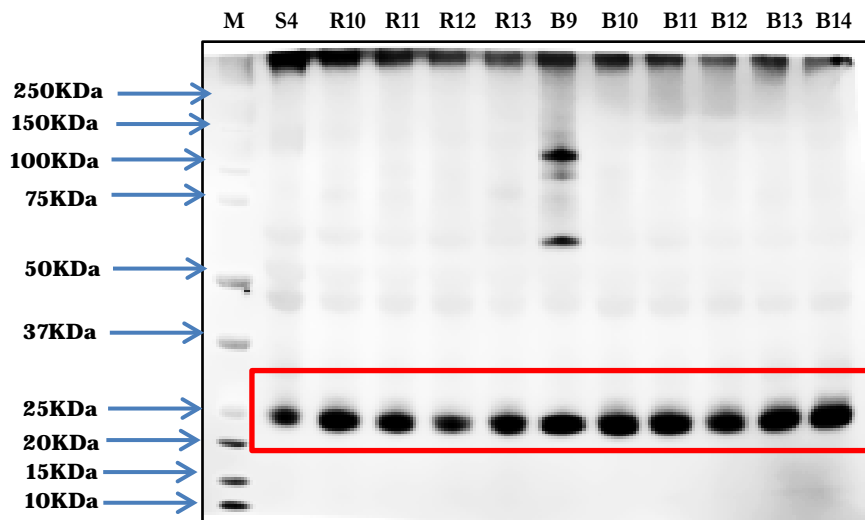

# Collagen V (>180KDa)

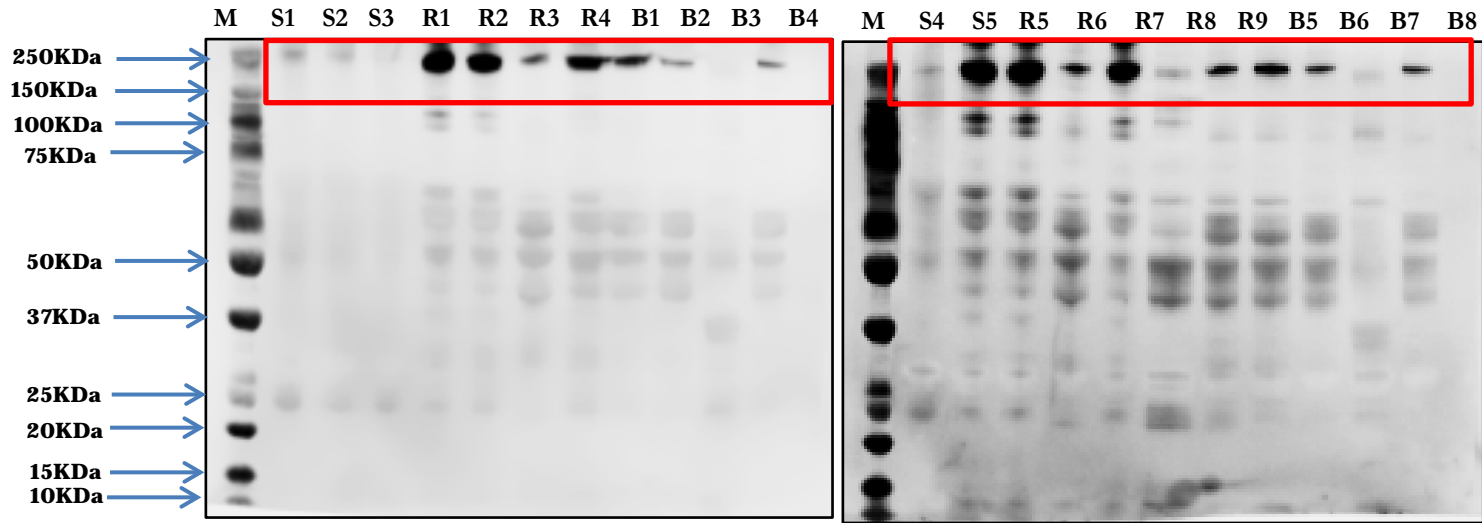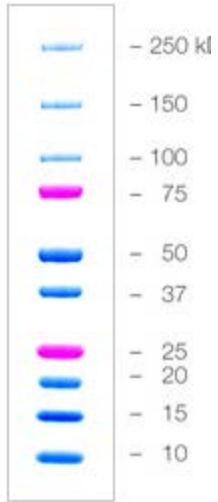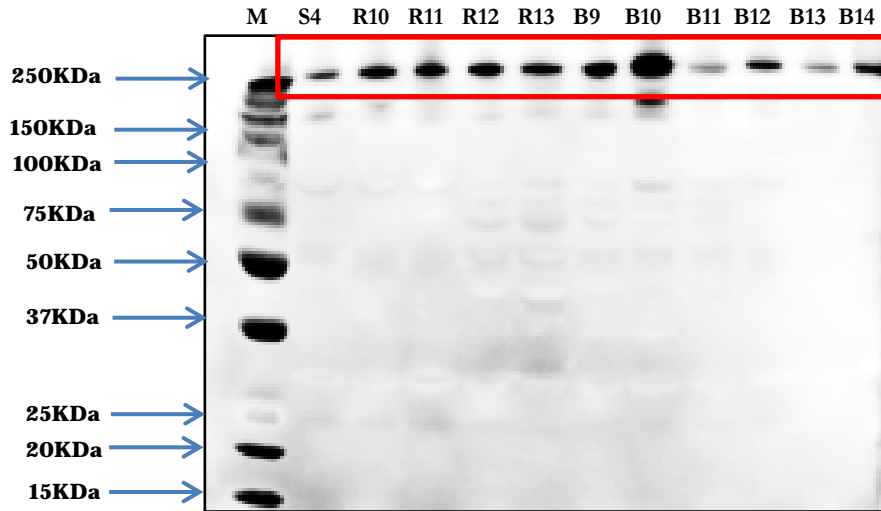

# KAT (~56KDa)

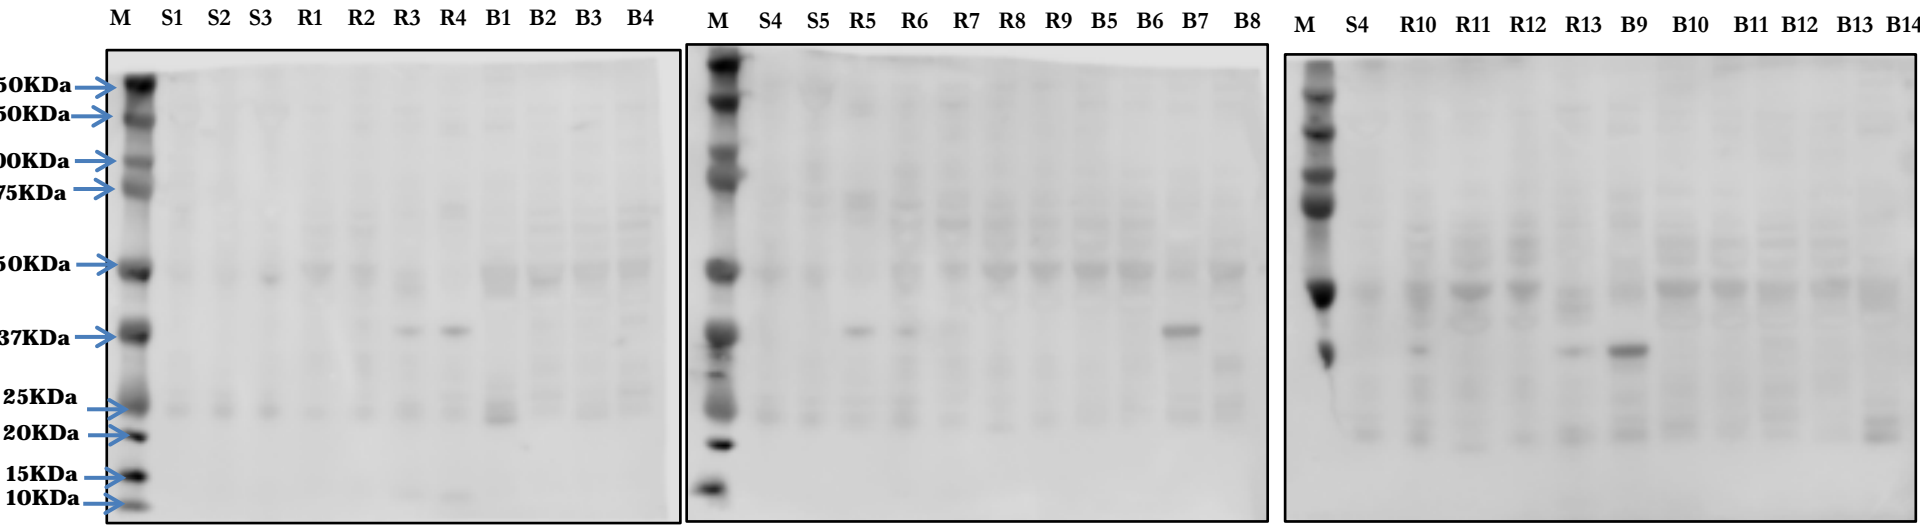

## Intensified blots to see the desired bands

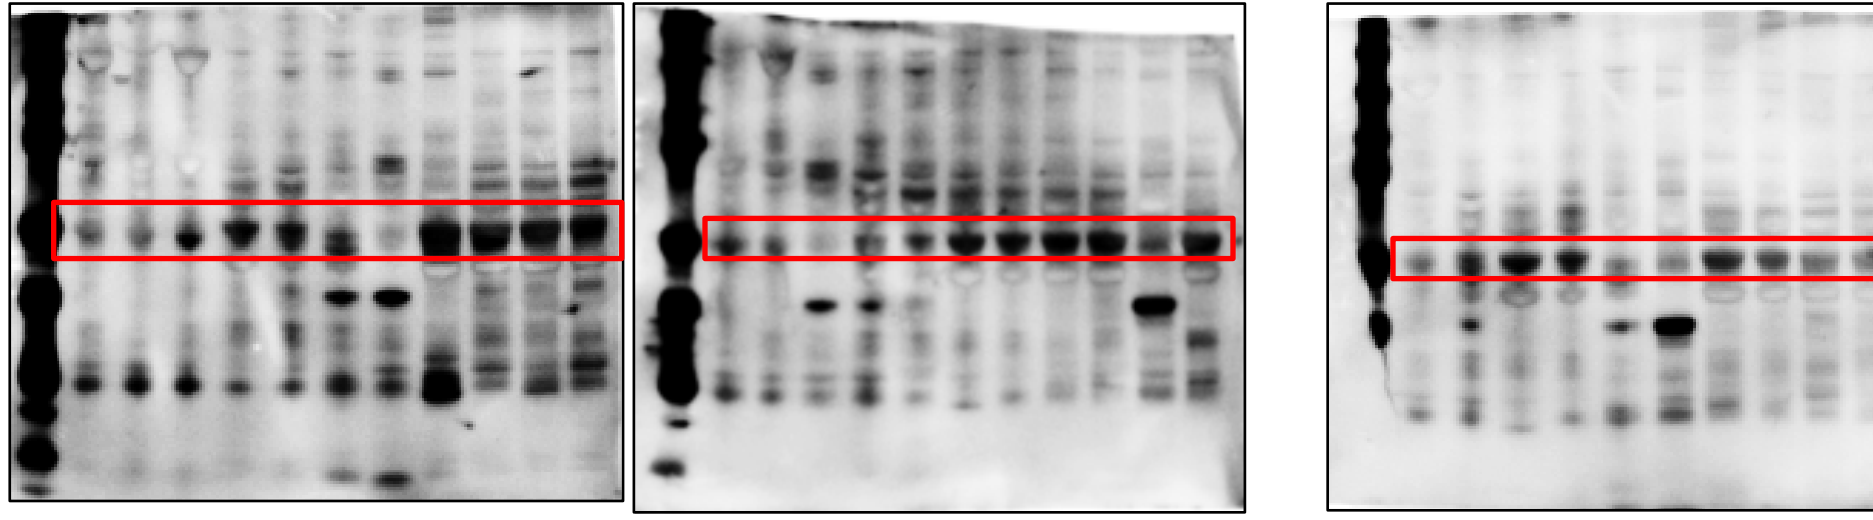

# CD9 for Collagen V and K $\alpha$ Tubulin1 (~24KDa)

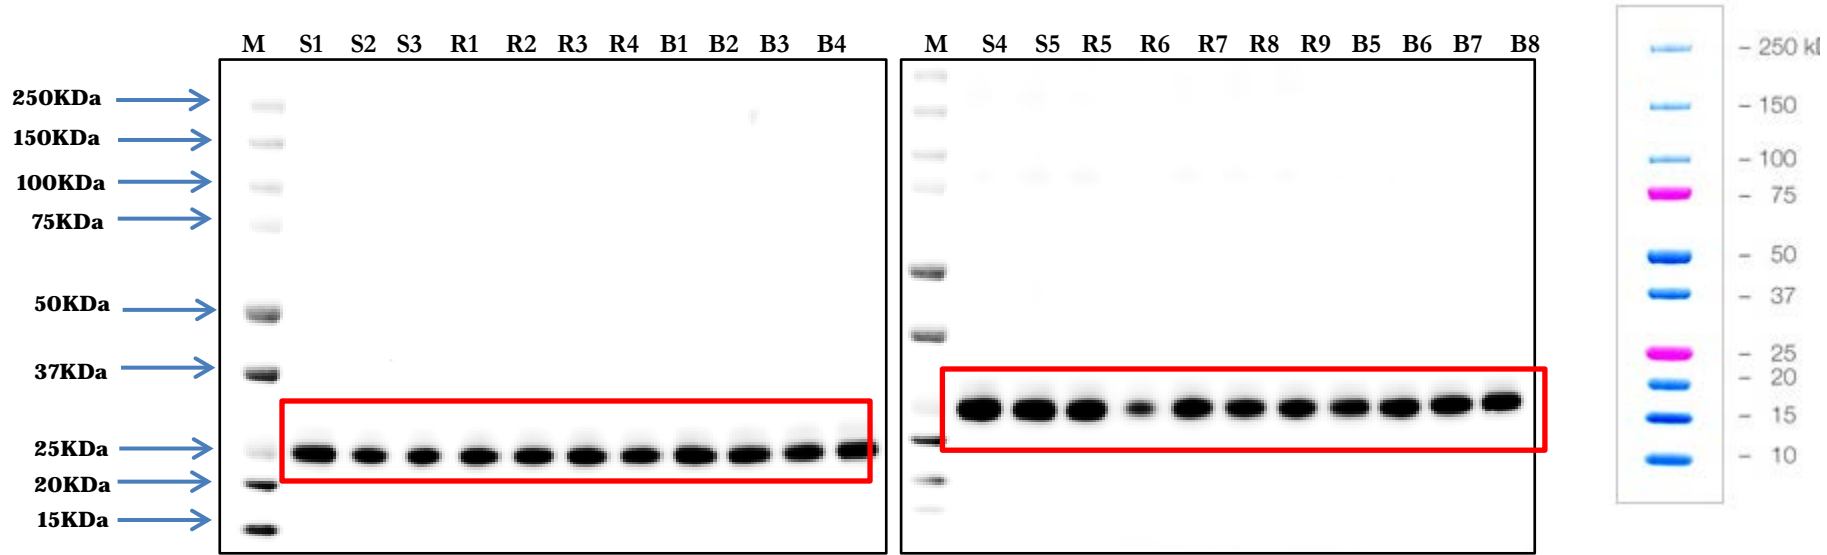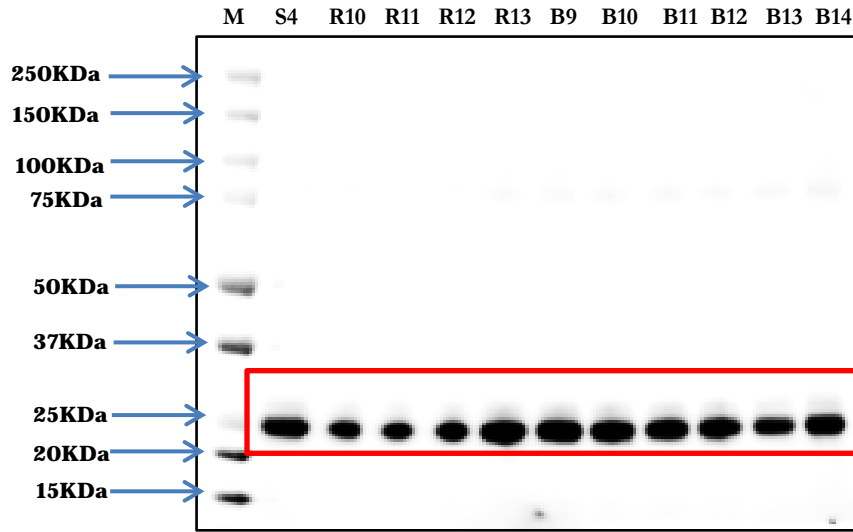



# HLA DQ (~Expected 29KDa, observed 32 KDa)

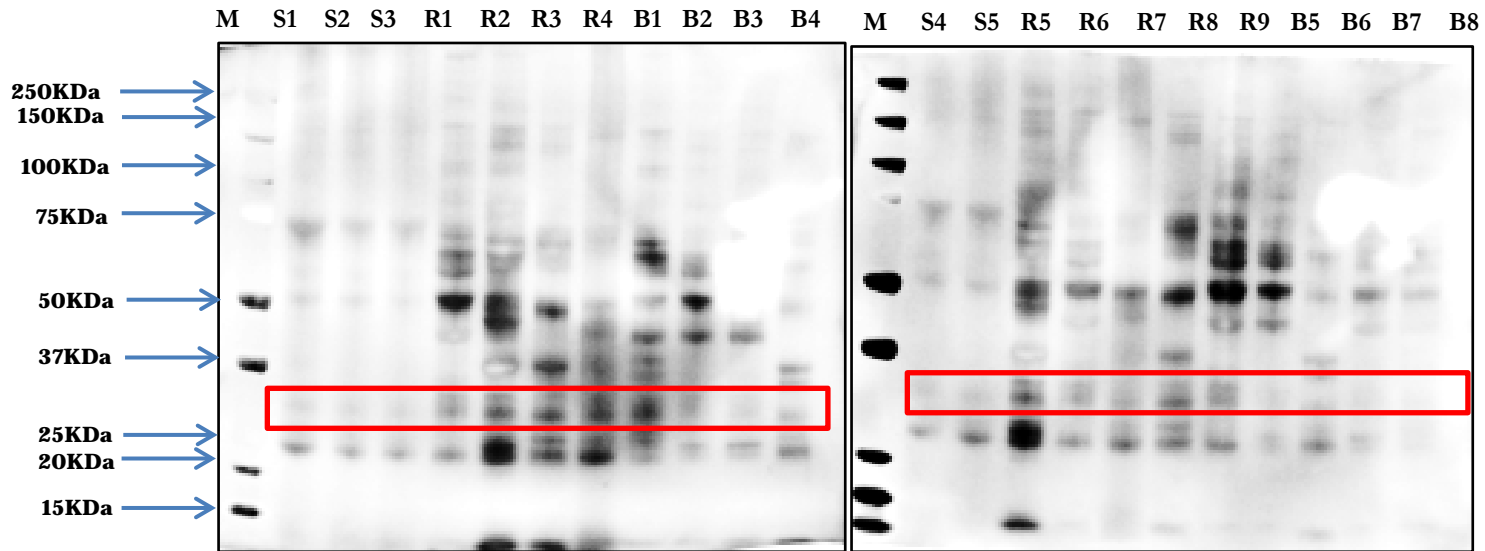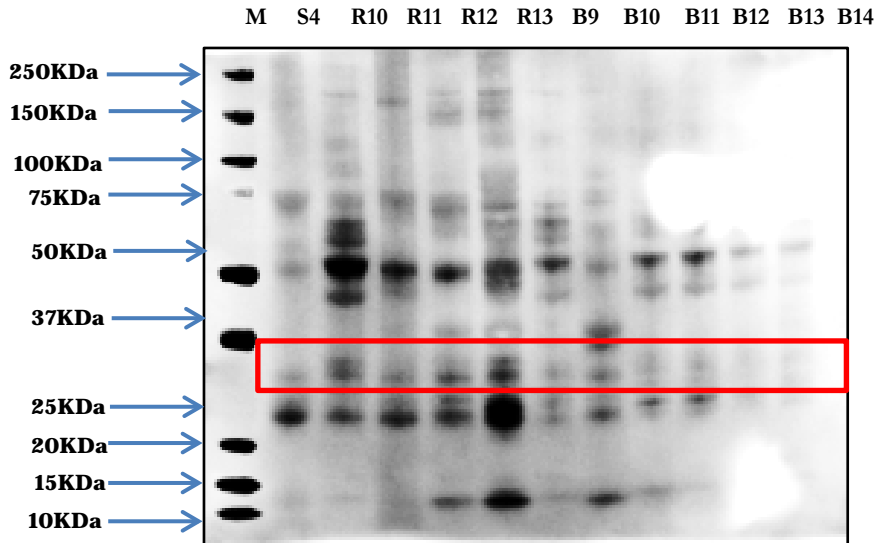

# HLA DR (~Expected 29KDa, observed 32 KDa)

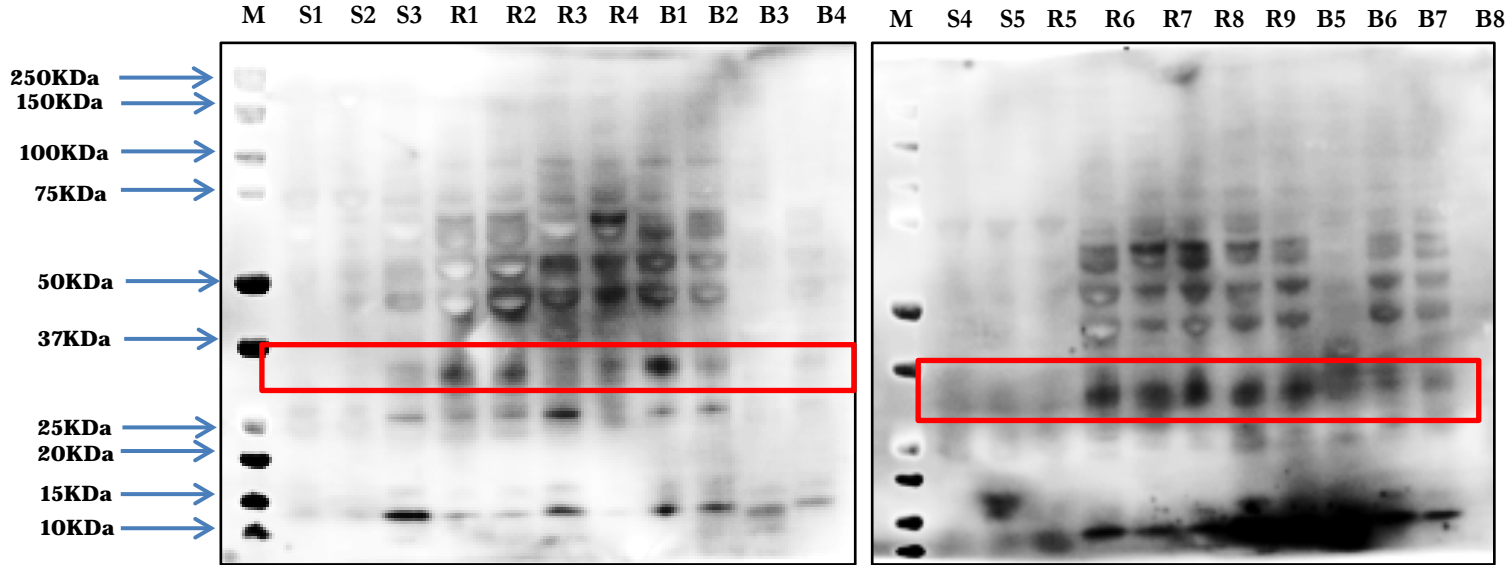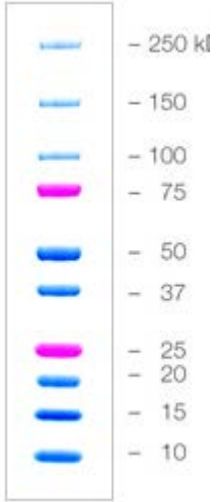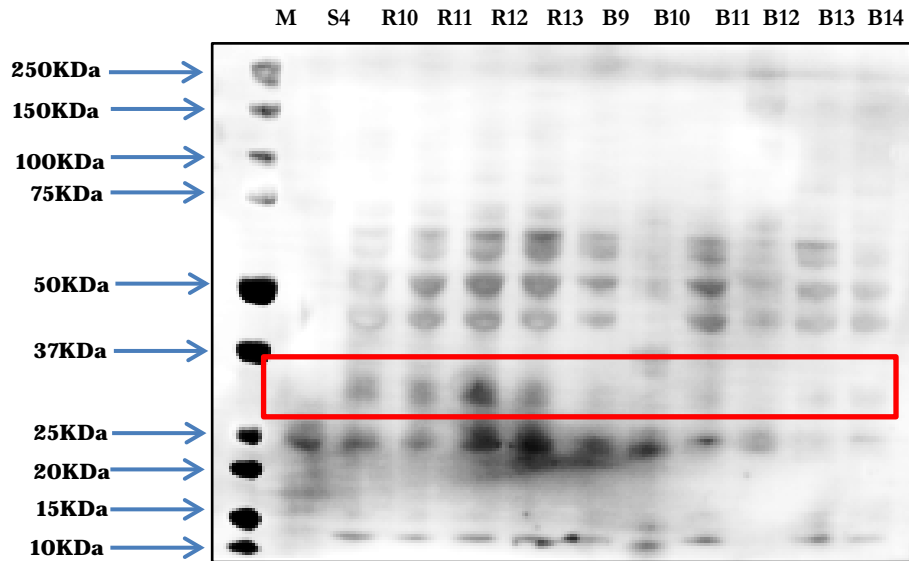

# W6/32 (~ 56KDa)

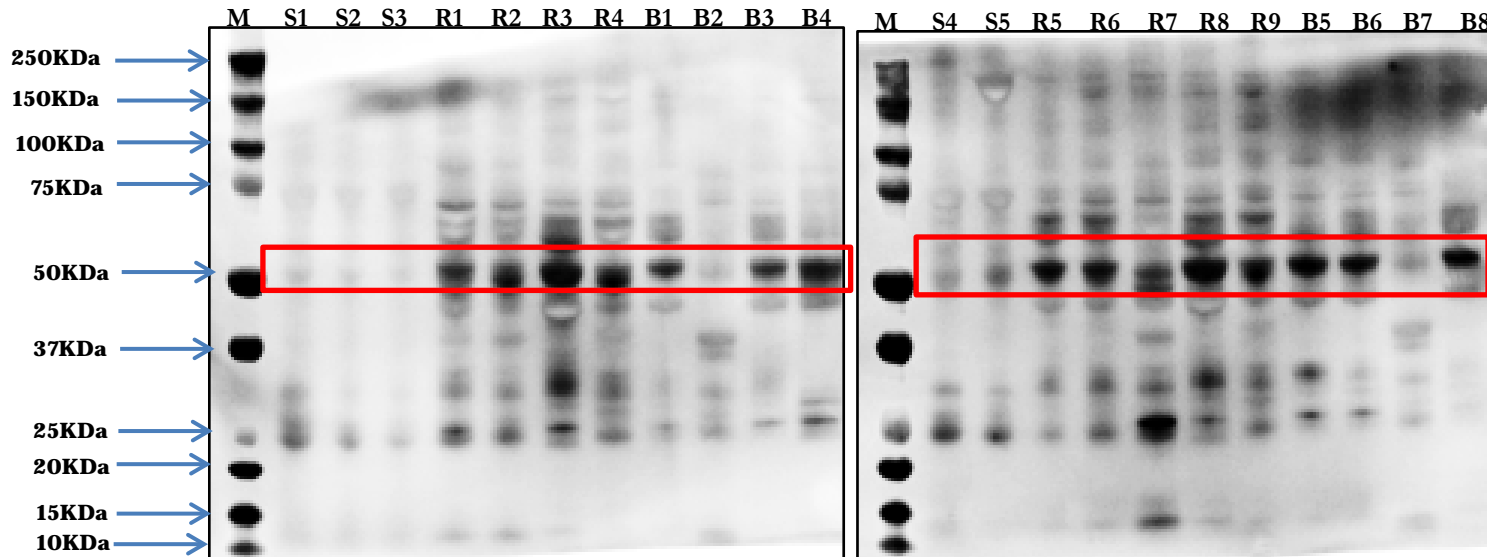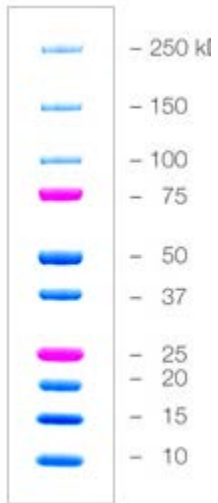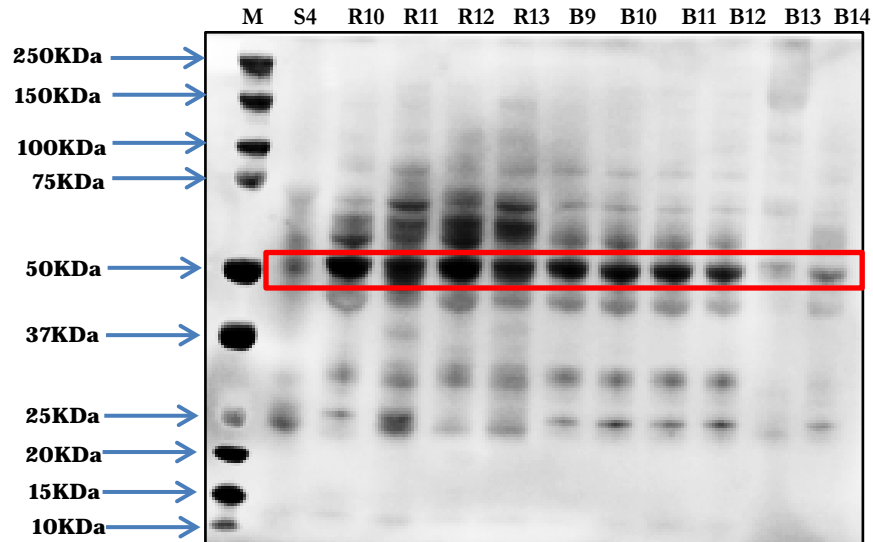

# CD9 for HLA-DQ, HLA-DR and W6/32 (~24KDa)

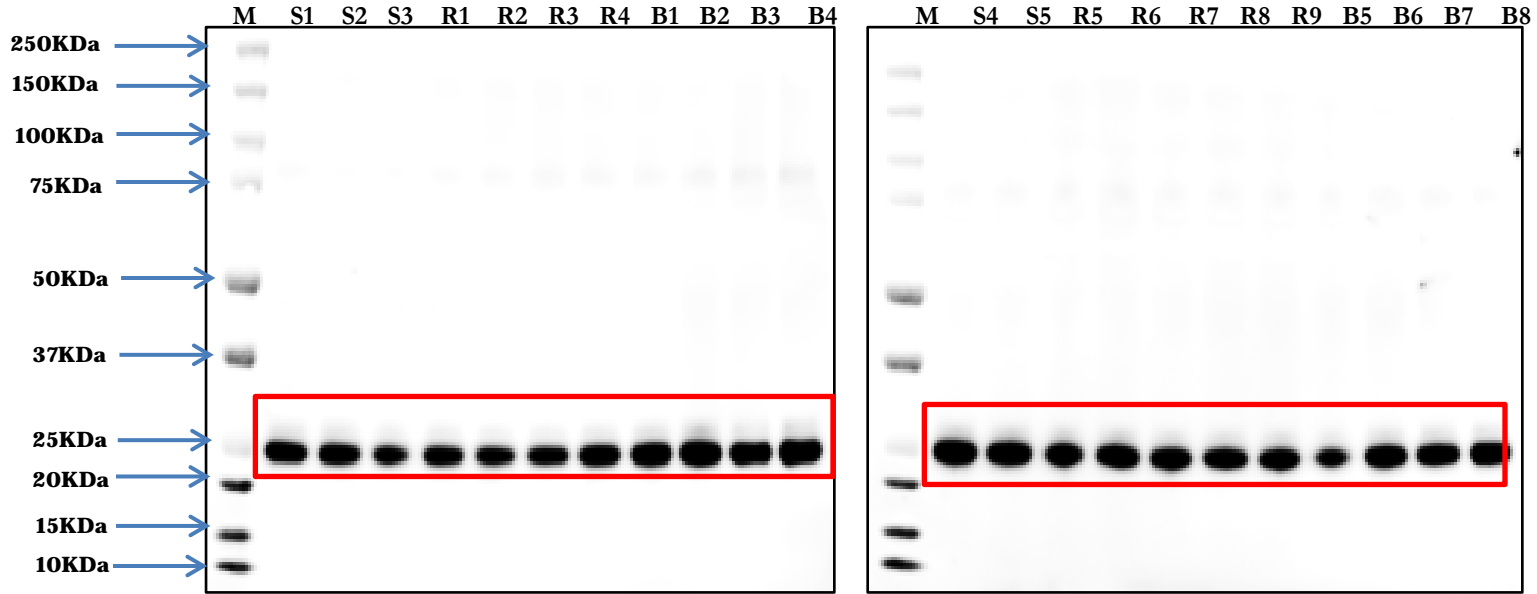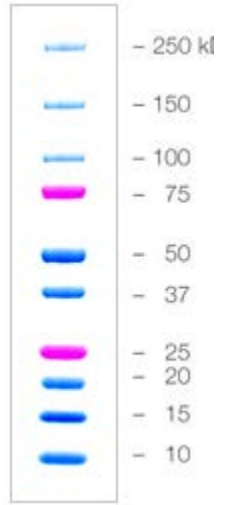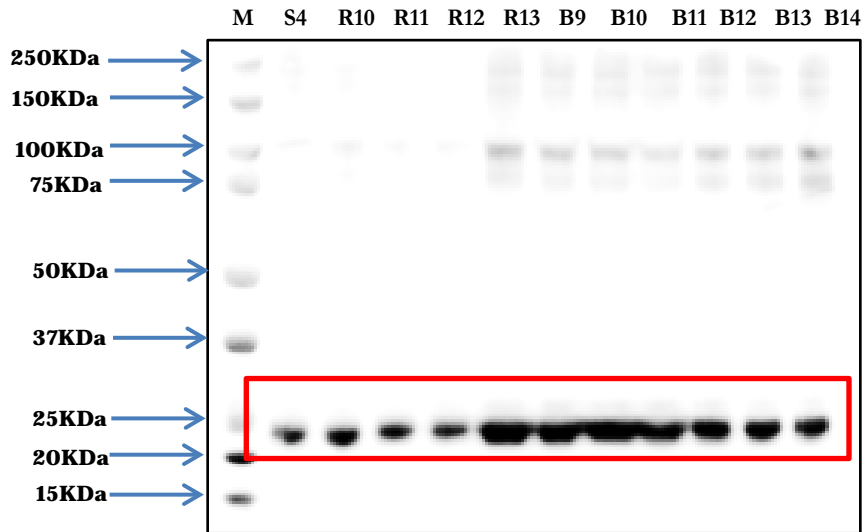

Supplement: NIHMS1740619-supplement-1.pdf [file NIHMS1740619-supplement-1.pdf]
